# Supplementary material
Source: PubMed Central journal article supplement (PMC8363570)
Supplement: NIHMS1713672-supplement-2.pdf [file NIHMS1713672-supplement-2.pdf]

CV

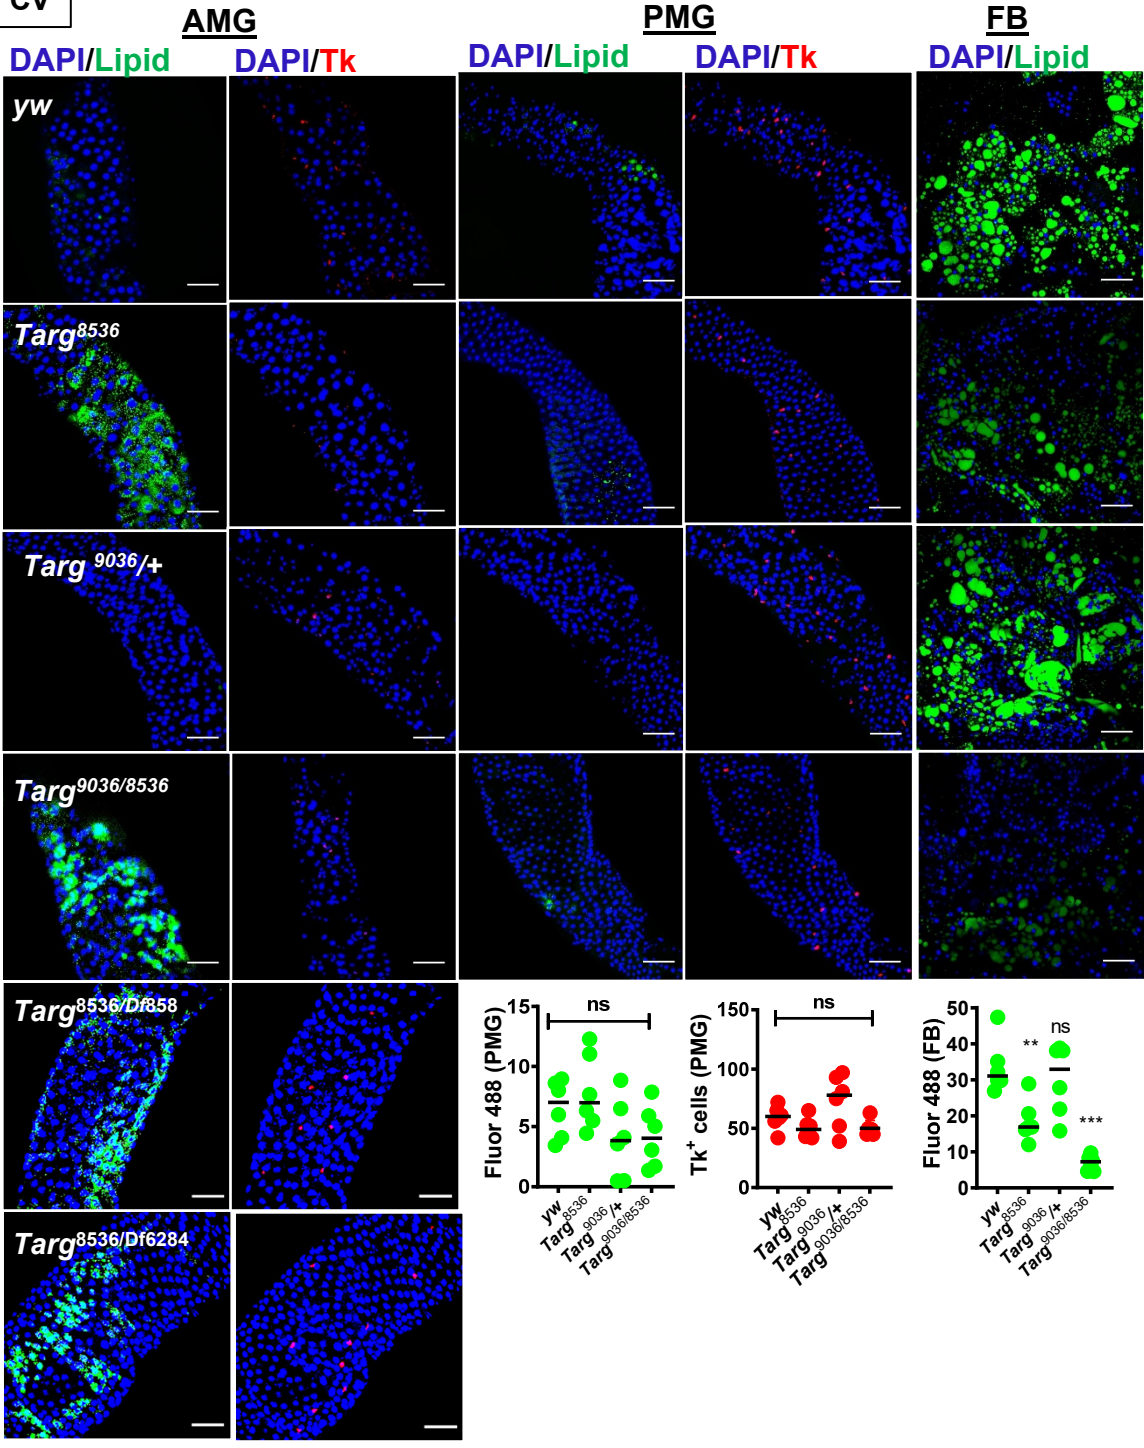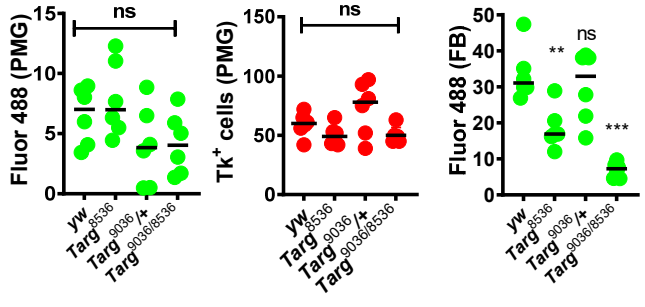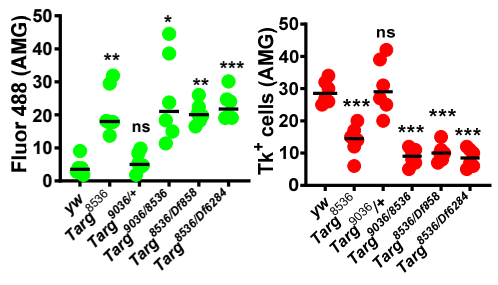

**Figure S1: *Targ* mutants phenocopy the GF fly phenotype.** Representative micrographs (above) and quantification (below) of Bodipy staining (Lipid) and Tk immunofluorescence of CV *yw* flies, *Targ*<sup>MG08536</sup> homozygotes (*Targ*<sup>0856</sup>), *Targ*<sup>MI09036/SM6a</sup> (*Targ*<sup>9036/+</sup>) heterozygotes, and *Targ*<sup>MG08536/MI09036</sup> (*Targ*<sup>9036/0856</sup>), *Targ*<sup>MG08536/Df (2R) BSC858</sup> (*Targ*<sup>8536/Df858</sup>) and *Targ*<sup>MG08536/Df (2R) Exel6284</sup> (*Targ*<sup>8536/Df6284</sup>) transheterozygotes in the AMG and, where noted, PMG, and FB. Experiments with deficiency transheterozygotes were conducted on a separate day. The mean measurement is indicated. Error bars represent the standard deviation. A Brown-Forsythe ANOVA with a Dunnett's T3 multiple comparisons test was used to evaluate statistical significance. ns not significant, \**p*<0.05 \*\**p*<0.01, \*\*\**p*<0.001. See also Fig 1.

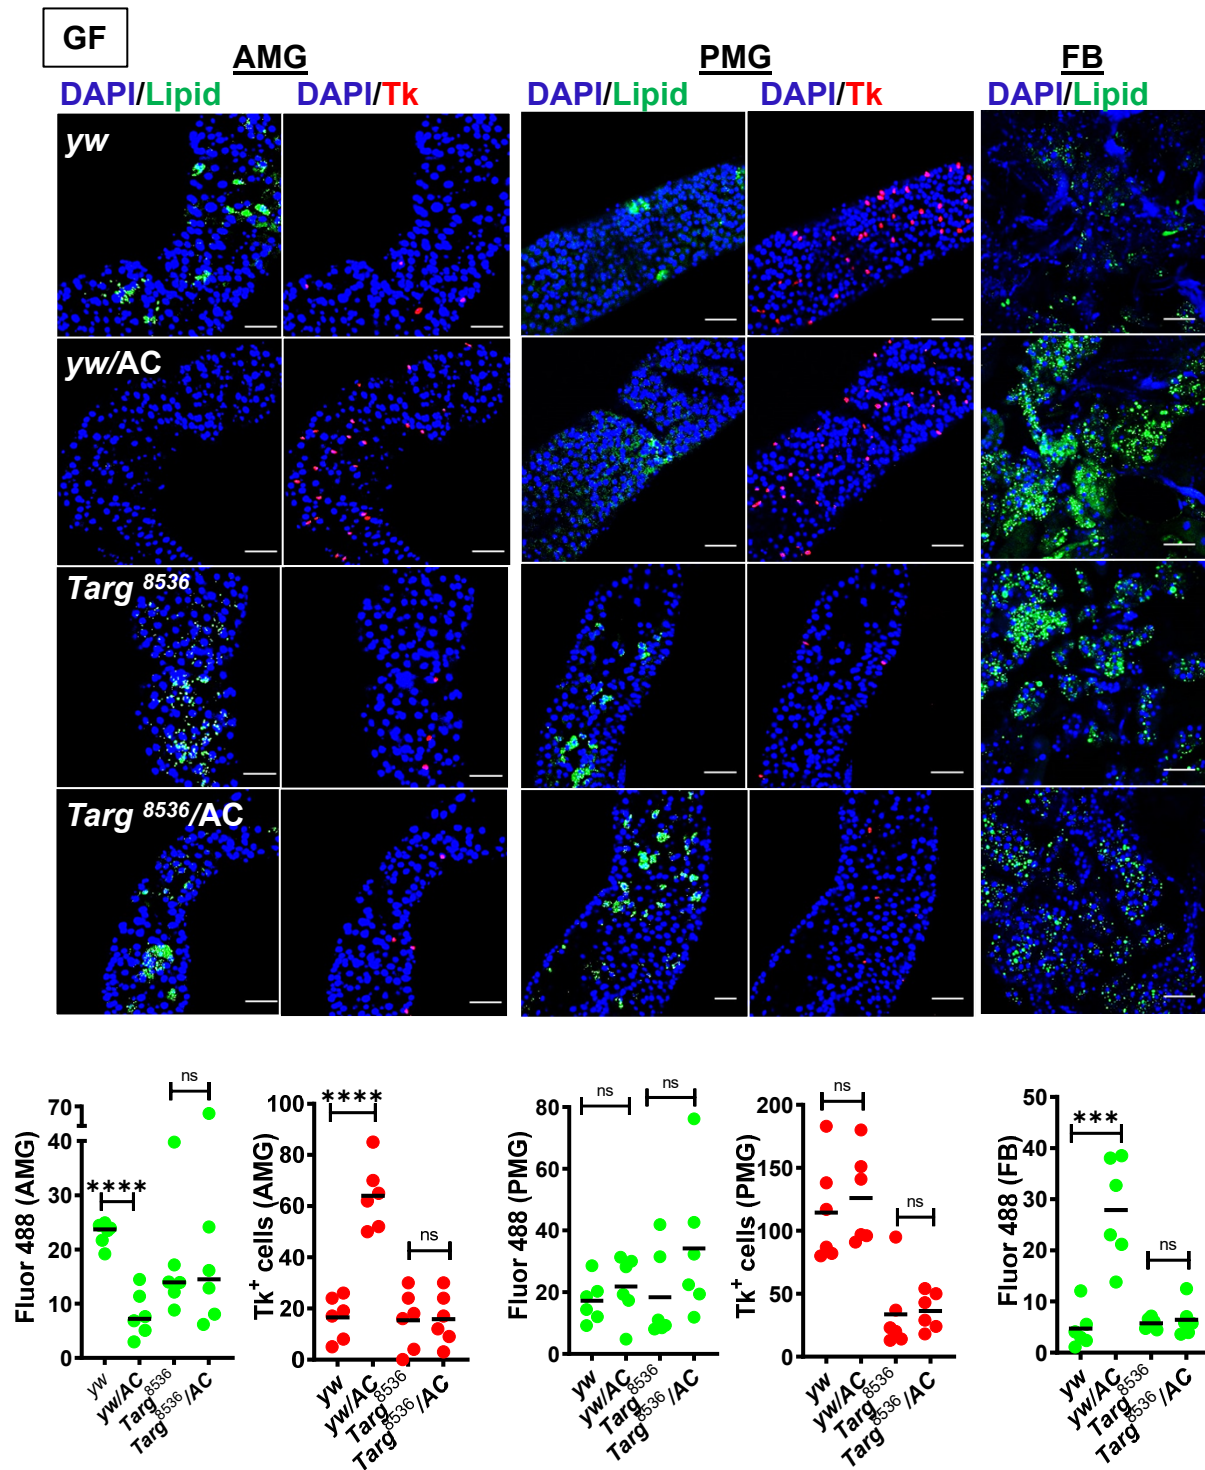

**Figure S2: *Targ* mutation blocks acetate rescue of GF flies.** Representative micrographs and quantification of Bodipy staining (Lipid) and Tk immunofluorescence in the AMG, PMG, and FB of *yw* flies and *Targ*<sup>MG08536</sup> homozygotes (*Targ*<sup>8536</sup>) fed LB broth supplemented with antibiotics alone (GF) or with 50 mM acetate (GF/AC). The mean measurement is indicated. Error bars represent the standard deviation. A student's t-test was used to evaluate statistical significance. ns not significant, \*\*\*  $p < 0.001$ , \*\*\*\*  $p < 0.0001$ . See also Fig 1.

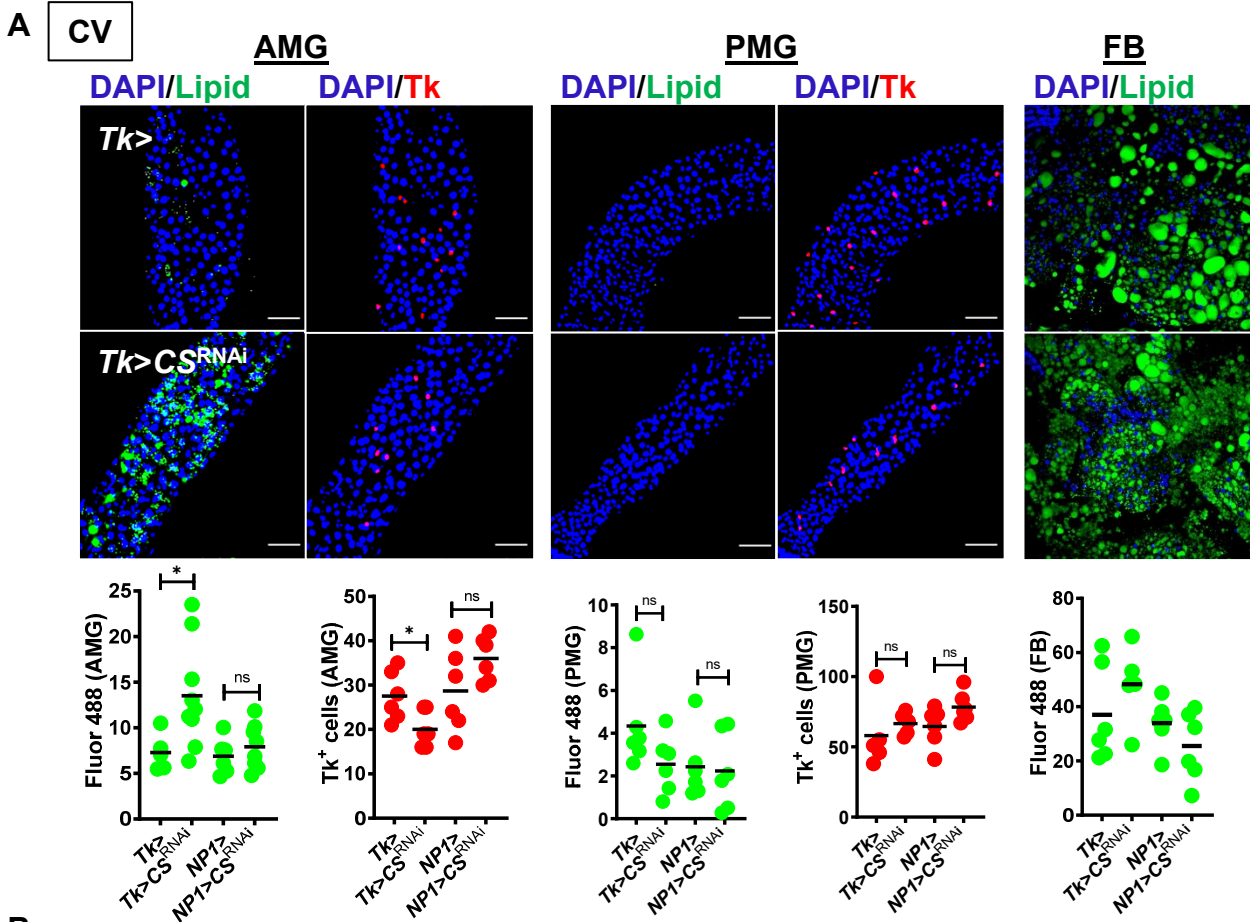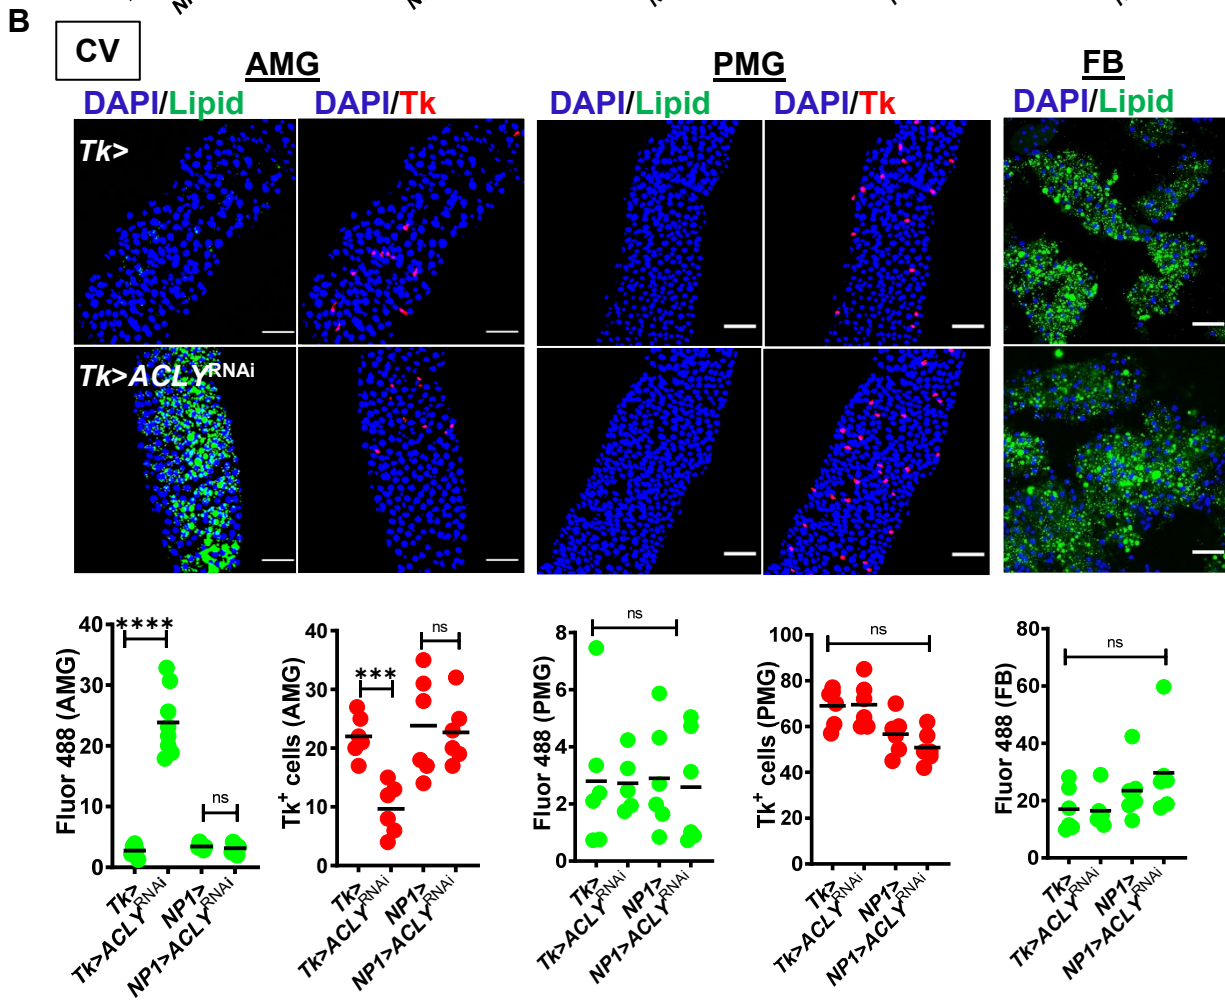

**Figure S3: Citrate synthase (CS) and ATP citrate lyase (ACLY) RNAi in EECs but not ECs reproduces the GF fly phenotype.** Representative micrographs and/or quantification of Bodipy staining (Lipid) and Tk immunofluorescence in the AMG, PMG, and FB of CV Tk>, NP1> and **(A)** Tk>CS<sup>RNAi</sup> and NP1>CS<sup>RNAi</sup> or **(B)** Tk>ACLY<sup>RNAi</sup> and NP1>ACLY<sup>RNAi</sup> flies. The mean measurement is indicated. Error bars represent the standard deviation. A student's t-test was used to evaluate statistical significance. ns not significant, \*p<0.05. \*\*\* p<0.001, \*\*\*\* p<0.0001. See also Fig 3.

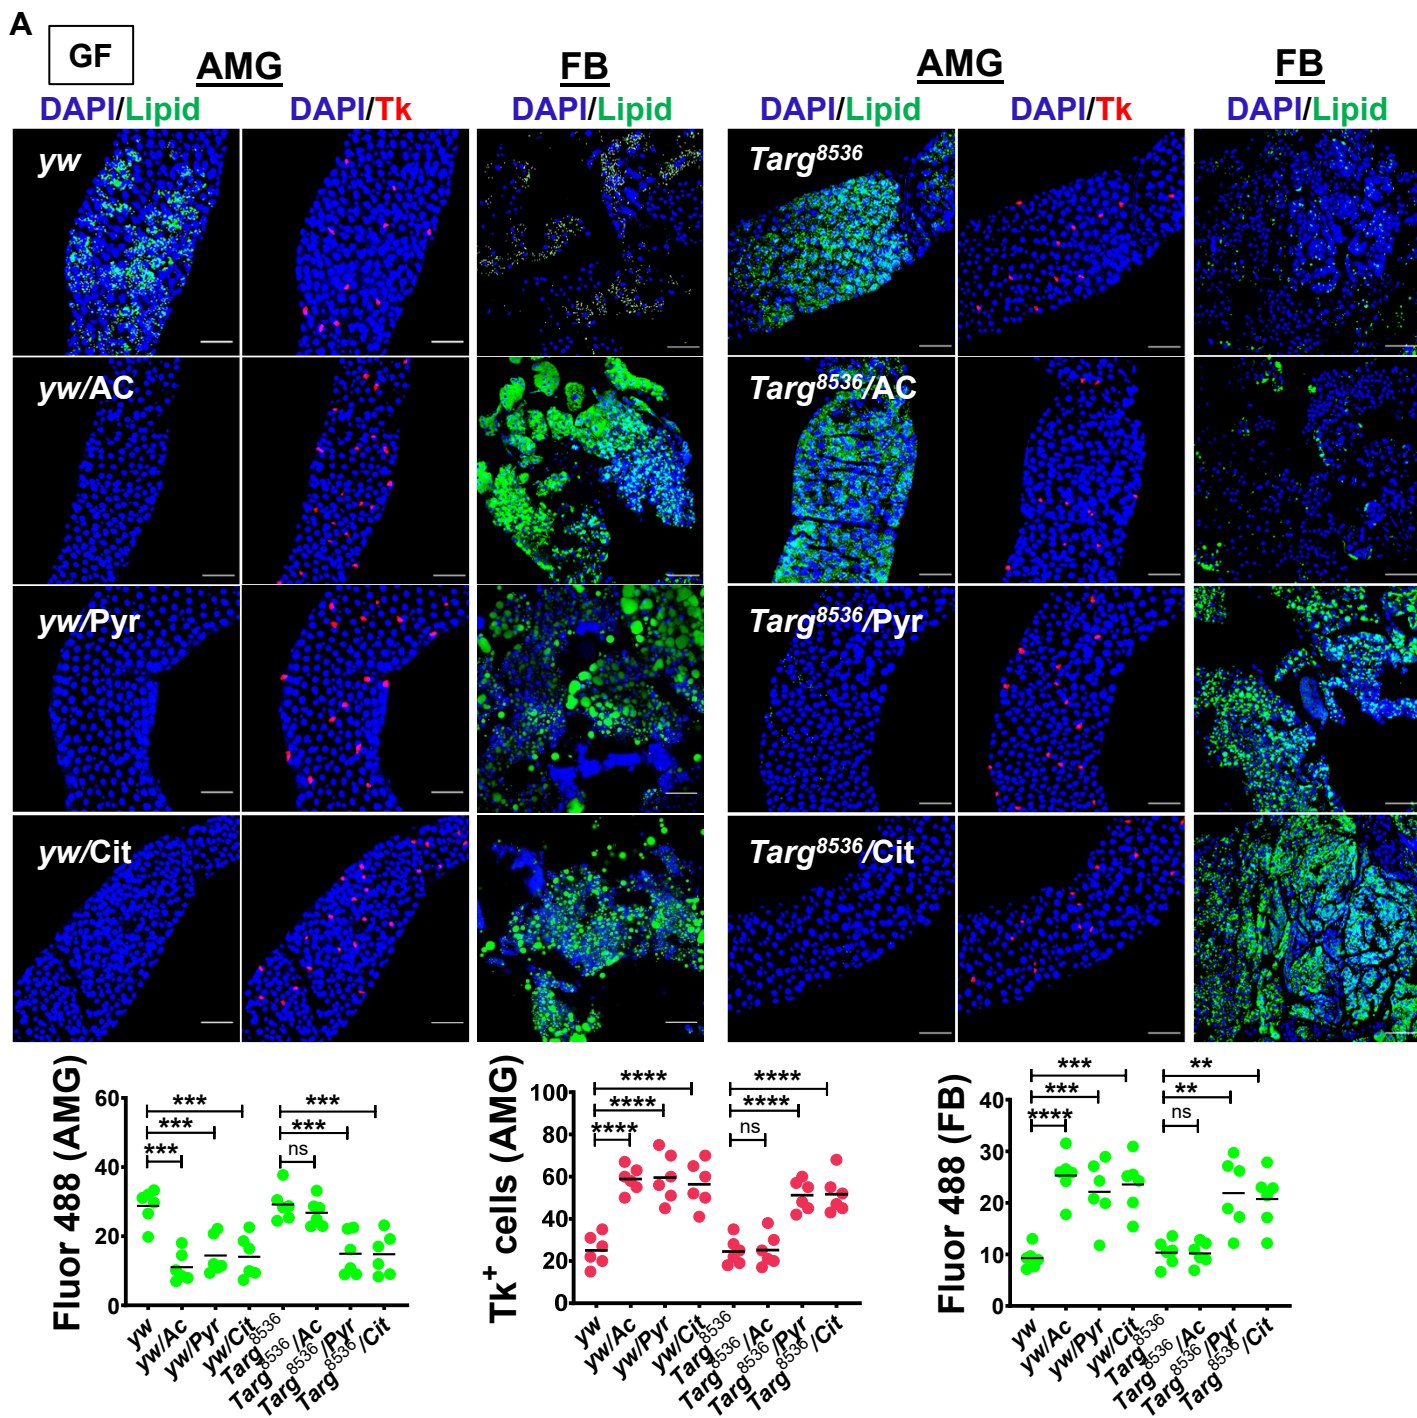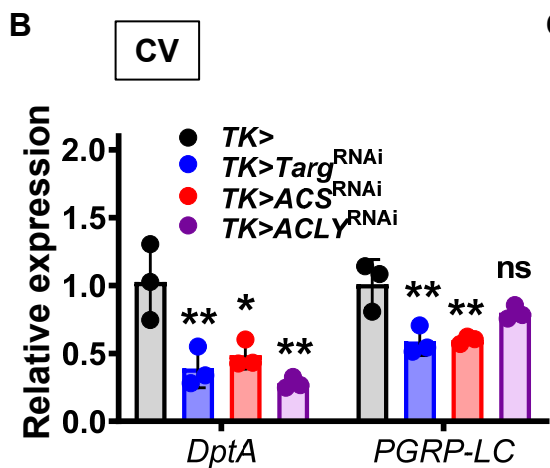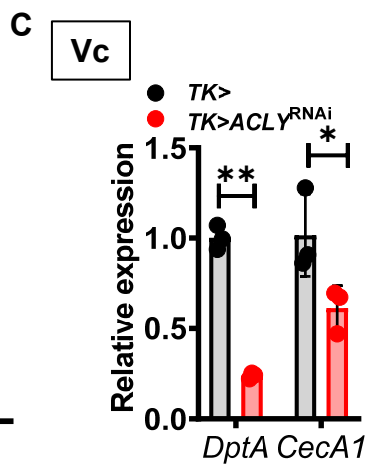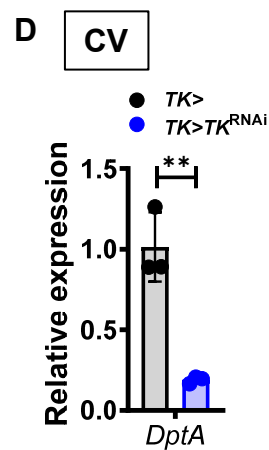

**Figure S4: The cellular acetyl-CoA pool and Tk participate in lipid homeostasis and IMD pathway signaling in GF, CV uninfected, and *V. cholerae*-infected flies. (A)** Representative micrographs (above) and quantification (below) of Bodipy staining (Lipid) and Tk immunofluorescence in the AMG and FB of *yw* or *Targ*<sup>8536</sup> mutant GF flies fed LB broth with or without acetate (AC), pyruvate (Pyr), or citrate (Cit). RT-qPCR analysis of **(B)** *DptA* and *PGRP-LC* expression in CV Tk> and Tk>*Targ*<sup>RNAi</sup>, Tk>*ACS*<sup>RNAi</sup>, or Tk>*ACLY*<sup>RNAi</sup> flies, **(C)** *DptA* and *CecA1* in *V. cholerae*-infected Tk> and Tk>*ACLY*<sup>RNAi</sup> flies and **(D)** *DptA* expression in CV Tk> or Tk>*Tk*<sup>RNAi</sup> flies. A subset of the data in S4B is also shown in Fig 1D. Statistical tests take this into account. The mean measurement is indicated. Error bars represent the standard deviation. An ordinary one-way ANOVA with Dunnett's multiple comparisons (A,B) or student's t-test (C-D) was used to evaluate statistical significance. ns not significant, \*p<0.05, \*\* p<0.01, \*\*\*p<0.001, \*\*\*\*p<0.0001. See also Fig 3.

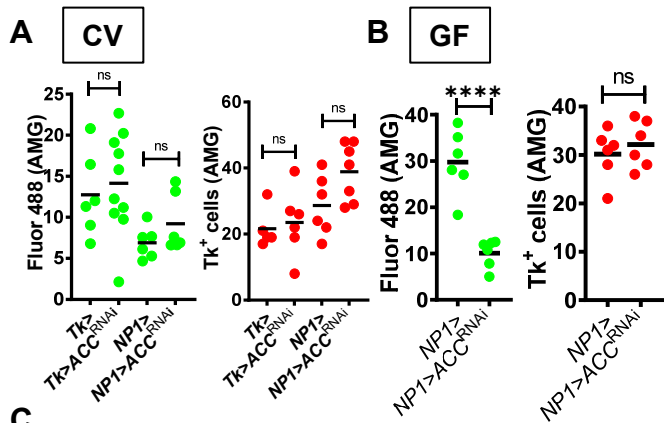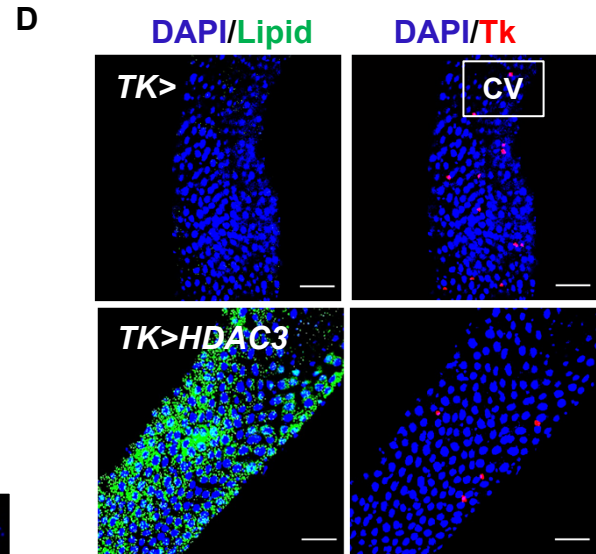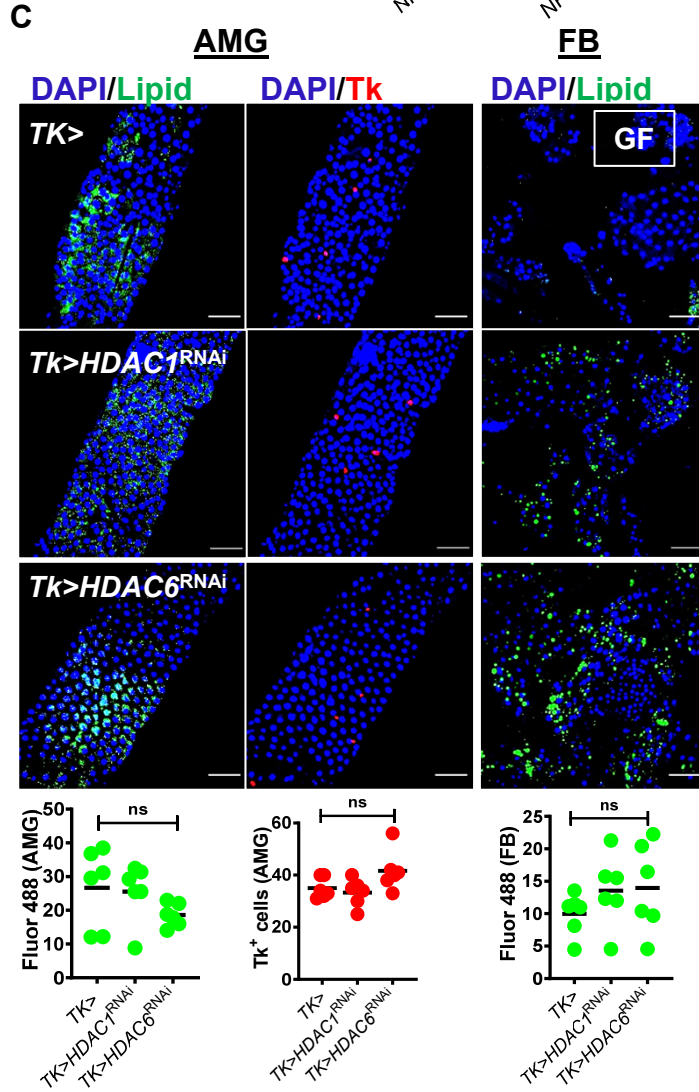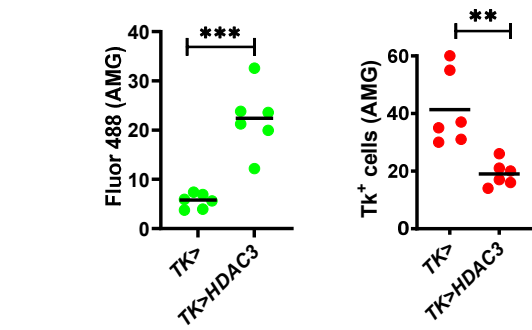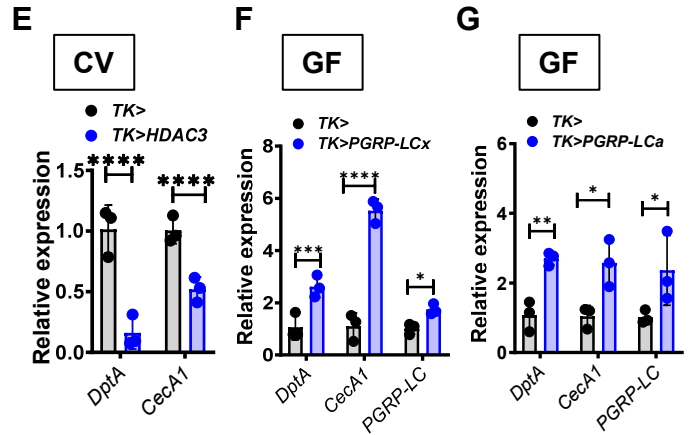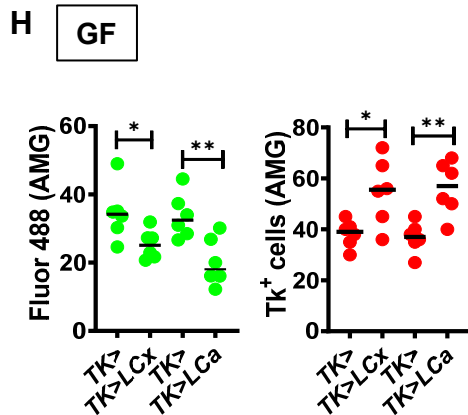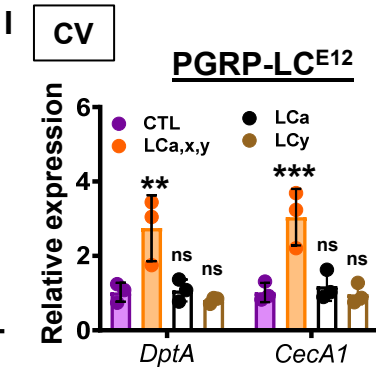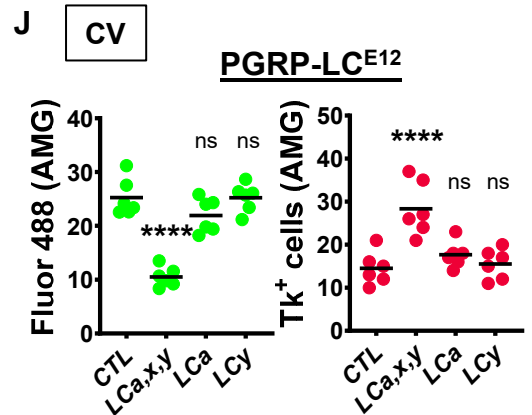



**Figure S5: HDAC1 or 6 RNAi does not rescue the antibiotic-treated fly phenotype; overexpression of HDAC3 reproduces the microbe-depleted phenotype.** Quantification of Bodipy staining (Lipid) and Tk immunofluorescence in the AMG of **(A)** CV Tk>, NP1>, Tk>ACC<sup>RNAi</sup>, and NP1>ACC<sup>RNAi</sup> flies and **(B)** GF Tk> and Tk>ACC<sup>RNAi</sup> flies. **(C)** Representative micrographs (above) and quantification (below) of Bodipy staining (Lipid) and Tachykinin (Tk) immunofluorescence in the AMG and FB of GF Tk>, Tk>HDAC1<sup>RNAi</sup> and Tk>HDAC6<sup>RNAi</sup> flies. This data was acquired with that presented in Fig 4B and shares the driver control. This was taken into account in the statistical analysis. **(D)** Representative micrographs and quantification of Bodipy staining (Lipid) and Tk immunofluorescence in the AMG of CV Tk> and Tk>HDAC3 flies. This data was acquired with that shown in Fig S7A using the same driver control. This was taken into account in the statistical analysis. RT-qPCR analysis of expression of the indicated genes in the intestines of **(E)** CV Tk> and Tk>HDAC3 flies, GF Tk> **(F)** Tk>PGRP-LCx or **(G)** Tk>PGRP-LCa flies. **(H)** Quantification of Bodipy staining (Lipid) and Tk immunofluorescence in the AMG of GF Tk> and Tk>PGRP-LCx or Tk>PGRP-LCa flies. **(I)** RT-qPCR quantification of *DptA* and *CecA1* and **(J)** quantification of Bodipy staining (Lipid) and Tachykinin (Tk) immunofluorescence in the AMG of CV PGRP-LC<sup>E12</sup> mutant flies expressing PGRP-LC<sub>xy</sub>, PGRP-LCa, or PGRP-LCy isoforms. The mean measurement is indicated. Error bars represent the standard deviation. A student's t-test (A,B, D-F, G) or an ordinary one-way ANOVA with Dunnett's multiple comparisons (C, H, I) was used to evaluate statistical significance. ns not significant, \* p<0.05, \*\* p<0.01, \*\*\* p<0.001, \*\*\*\* p<0.0001. See also Fig 4.

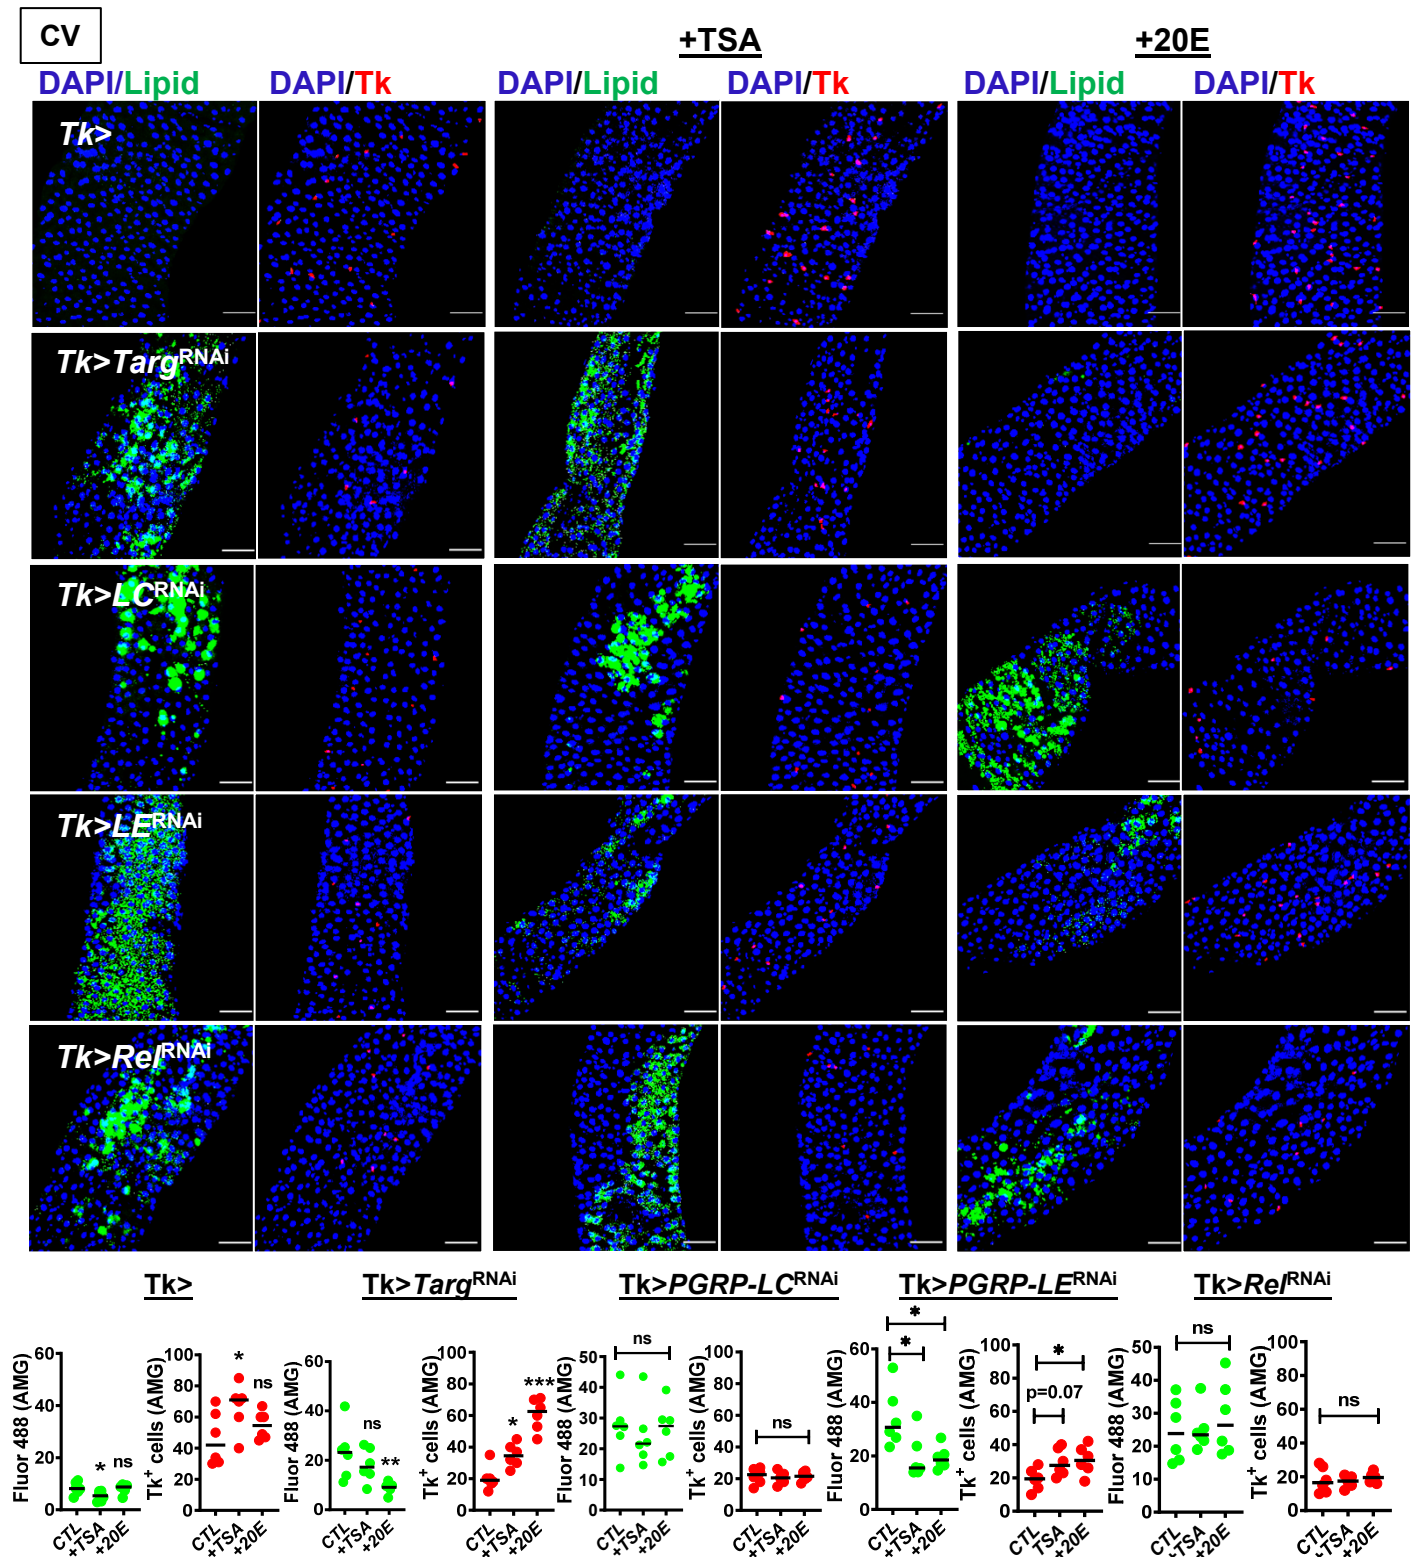

**Figure S6: Acetate acts upstream of histone acetylation and 20E, and 20E acts upstream of PGRP-LC.** Representative micrographs and quantification of Bodipy staining (Lipid) and Tk immunofluorescence in the AMG of CV *Tk>* and *Tk>Targ<sup>RNAi</sup>*, *Tk>LC<sup>RNAi</sup>*, *Tk>LE<sup>RNAi</sup>*, or *Tk>Re<sup>RNAi</sup>* flies. Flies were fed LB broth alone or supplemented with the histone deacetylase inhibitor trichostatin A (TSA) or 20-hydroxyecdysone (20E) as indicated. An ordinary one-way ANOVA with Dunnett's multiple comparisons test was used to evaluate statistical significance. ns not significant, \*  $p < 0.05$ , \*\*\*  $p < 0.001$ . See also Fig 5.

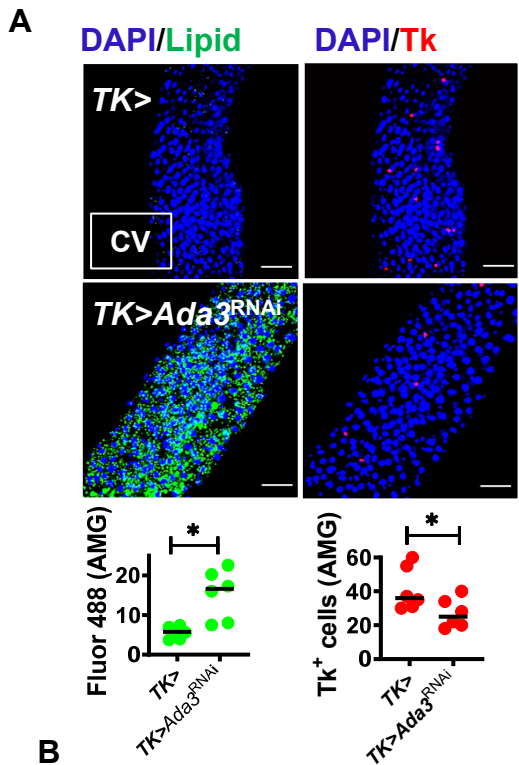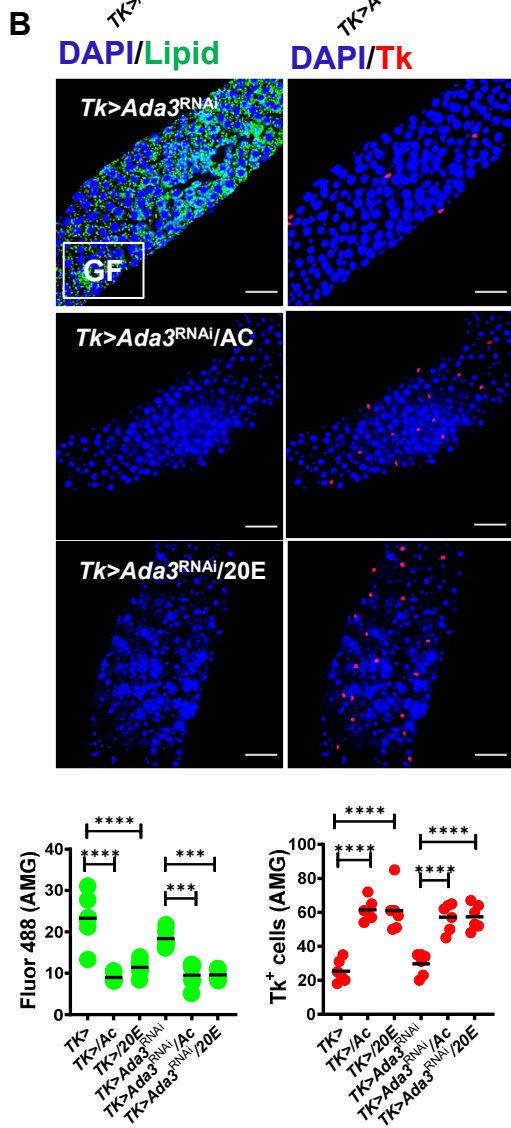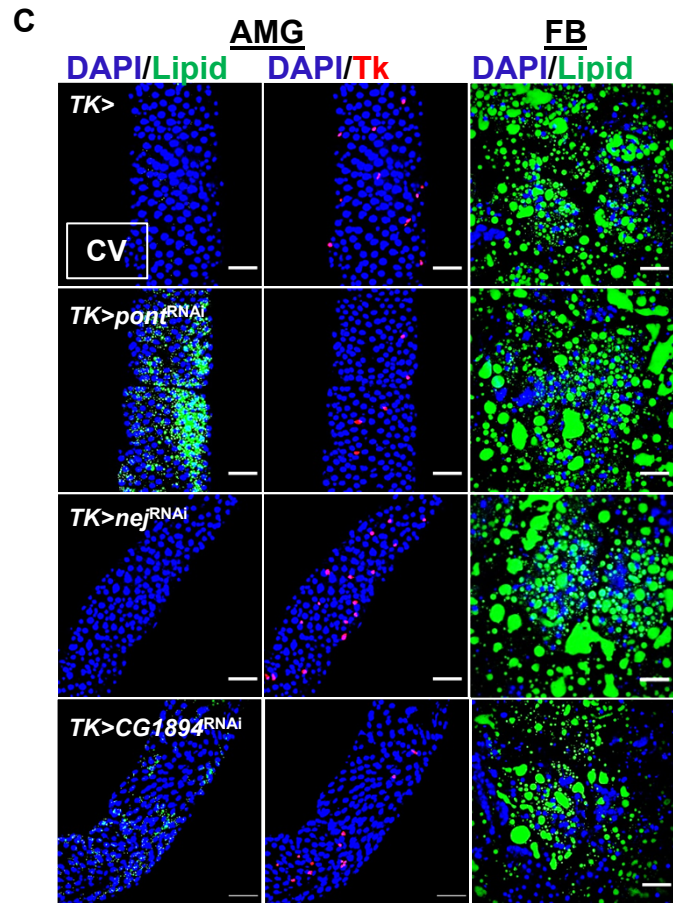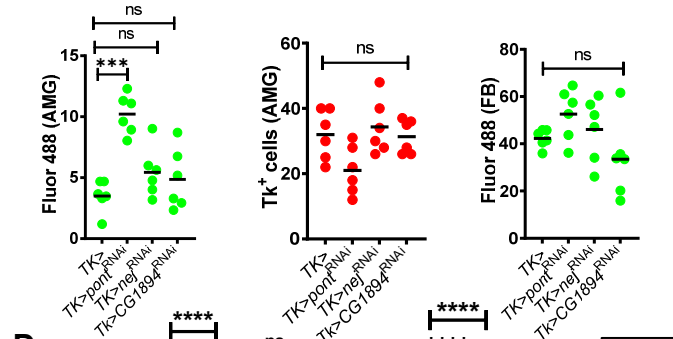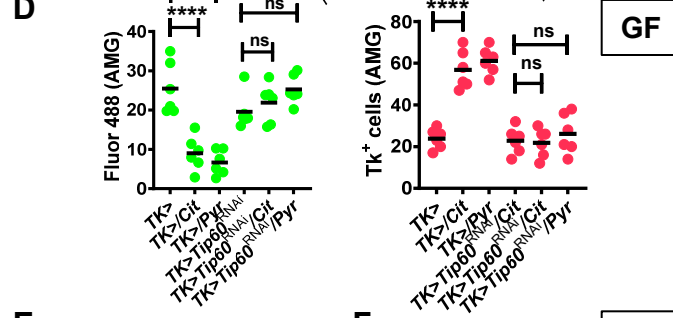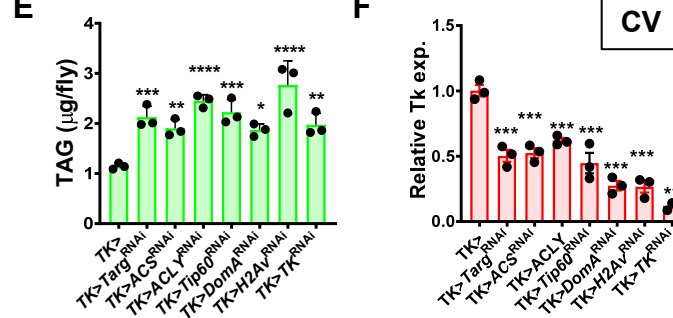

**Figure S7: RNAi of the genes encoding the Tip60 histone acetylase complex component pontin and the dATAC and dSAGA HAT complex component Ada3 but not those encoding the HATs Nejire and CG1894 recapitulate the microbe-depleted phenotype; Ada3 RNAi does not block acetate rescue.** Representative micrographs and quantification of Bodipy staining (Lipid) and Tk immunofluorescence in the AMG and FB of **(A)** CV Tk> and Tk> *Ada3*<sup>RNAi</sup>, **(B)** GF Tk> and Tk>*Ada3*<sup>RNAi</sup> flies with or without 50 μM acetate (AC) or 10 μM 20E supplementation, or **(C)** CV Tk> and Tk>*pont*<sup>RNAi</sup>, Tk>*nej*<sup>RNAi</sup>, or Tk>*CG1894*<sup>RNAi</sup> flies. **(D)** Quantification of Bodipy staining (Lipid) and Tk immunofluorescence in the AMG of the indicated GF flies fed LB alone or supplemented with acetate, pyruvate, or citrate. **(E)** Quantification of the triacylglyceride content (TAG) of whole flies of the indicated genotype. Experimental triplicates consisting of five female flies each were performed. **(F)** RT-qPCR quantification of *Tk* transcription in the intestines of flies with the indicated genotypes. Experimental triplicates were performed. For (A), a student's t-test was used to calculate statistical significance. For (B-F), statistical significance was calculated using a one-way ANOVA with a Dunnett's multiple comparisons test. The data in Fig S7A and S5D and in Fig S7B and 7B were acquired jointly and share the driver-only control. This was taken into account in the statistical analysis. ns not significant, \* p<0.05, \*\*p<0.01, \*\*\* p<0.001, \*\*\*\* p<0.0001, See also Fig 7.

**Table S1. Percent decrease in gene expression for RNAi and mutant fly lines by RT-qPCR, see also Figures 1, 2, 4, 5, 6, and 7.**

| <b>RNAi strains</b>                            | <b>GAL4 strains</b> | <b>% decrease</b> | <b>P value</b> |
|------------------------------------------------|---------------------|-------------------|----------------|
| <i>Targ</i> <sup>RNAi</sup> (BL 57427)         | <i>Actin-Gal4</i>   | 44.4              | 0.0025         |
| <i>Targ</i> <sup>8536</sup> (BL 26121)         | NA                  | 72.8              | 0.0081         |
| <i>Targ</i> <sup>9036/+</sup> (BL 51248)       | NA                  | 33.5              | 0.0992         |
| <i>Targ</i> <sup>8536/9036</sup>               | NA                  | 78.0              | 0.0057         |
| <i>ACS</i> <sup>RNAi</sup> (BL 41917)          | <i>Tk-Gal4</i>      | 61.9              | 0.0047         |
| <i>ACC</i> <sup>RNAi</sup> (BL 34885)          | <i>Tk-Gal4</i>      | 36.3              | 0.1041         |
| <i>CS</i> <sup>RNAi</sup> (BL 36740)           | <i>Tk-Gal4</i>      | 46.4              | 0.0140         |
| <i>ACL</i> <i>Y</i> <sup>RNAi</sup> (BL 65175) | <i>Tk-Gal4</i>      | 32.5              | 0.0084         |
| <i>HDAC1</i> <sup>RNAi</sup> (BL 31616)        | <i>Tk-Gal4</i>      | 21.5              | 0.0942         |
| <i>HDAC3</i> <sup>RNAi</sup> (BL 31633)        | <i>Tk-Gal4</i>      | 22.7              | 0.0347         |
| <i>HDAC4</i> <sup>RNAi</sup> (BL 28549)        | <i>Tk-Gal4</i>      | 31.2              | 0.0122         |
| <i>HDAC6</i> <sup>RNAi</sup> (BL 31053)        | <i>Tk-Gal4</i>      | 58.7              | <0.0001        |
| <i>Tip60</i> <sup>RNAi</sup> (BL 35243)        | <i>Tk-Gal4</i>      | 31.6              | 0.0912         |
| <i>Pont</i> <sup>RNAi</sup> (BL 50972)         | <i>Tk-Gal4</i>      | 42.5              | 0.0064         |
| <i>Ada3</i> <sup>RNAi</sup> (BL 32451)         | <i>Tk-Gal4</i>      | 40.6              | 0.0266         |
| <i>Gcn5</i> <sup>RNAi</sup> (BL 33981)         | <i>Tk-Gal4</i>      | 42.4              | 0.0009         |
| <i>Nej</i> <sup>RNAi</sup> (BL 31728)          | <i>Tk-Gal4</i>      | ND                | -              |
| <i>HAT (CG1894)</i> <sup>RNAi</sup> (BL 34925) | <i>Tk-Gal4</i>      | ND                | -              |
| <i>Shade</i> <sup>RNAi</sup> (BL 67356)        | <i>Tk-Gal4</i>      | 57.2              | 0.0087         |
| <i>EcR</i> <sup>RNAi</sup> (BL 58286)          | <i>Tk-Gal4</i>      | 17.2              | 0.1734         |
| <i>Tachykinin</i> <sup>RNAi</sup> (JF01818)    | <i>Tk-Gal4</i>      | 89.8              | 0.0008         |
| <i>DomA</i> <sup>RNAi</sup> (BL 65873)         | <i>Tk-Gal4</i>      | 51.1              | 0.0182         |
| <i>DomB</i> <sup>RNAi</sup> (BL 55917)         | <i>Tk-Gal4</i>      | 44.3              | 0.0231         |
| <i>H2Av</i> <sup>RNAi</sup> (BL 44056)         | <i>Tk-Gal4</i>      | 48.8              | 0.0358         |

\*ND, not done

**Table S2. RT-qPCR primers, see also Figures 1-7.**

| <b>Primer</b> | <b>Sequence</b>                |
|---------------|--------------------------------|
| Targ-F        | ACTTGGCTCCGGTATGG              |
| Targ-R        | TCGATTATCAGCTGGGCG             |
| ACS-F         | CCA TGA TTC TGG AGC TGC CTA    |
| ACS-R         | GCC TTC AGG TAC AGG GGT TTC    |
| ACC-F         | TAA CAA CGG AGT CAC CCA CA     |
| ACC-R         | CAG GTC ACA ACC GAT GTA CG     |
| CS-F          | TGC CAA ATG TGG GAG CCT ATG    |
| CS-R          | ATG CTG CTT GCG GAA GTT CTT    |
| ACLY-F        | TCC GGC AAG GAC ATC CTG A      |
| ACLY-R        | GGA ATT TAC TGT GGA AAA ACG GC |
| HDAC1-F       | AAC AAG GCA TCC TCA GAG A      |
| HDAC1-R       | CGA TTC CTC GCC ATC AGC TC     |
| HDAC3-F       | CTT CCA CAG CGA CGA GTA CA     |
| HDAC3-R       | CTT CGT ATA GGC CAC GGA AT     |
| HDAC4-F       | GCA CAG GTG GAC CCA CAG AG     |
| HDAC4-R       | CAT GAG ATG TTC ACG TTA AAG C  |
| HDAC6-F       | ACT GTT GCC TGT GGG ACA AGG    |
| HDAC6-R       | TCC GTC AGA TTT AGT TCG        |
| Tip60-F       | AAC CAC AAA TAT GAG TTC GAC GA |
| Tip60-R       | TGT GCA TCC TGA CGG GTA AAC    |
| Pont-F        | GTG GTG GAC CTC ATC AAA TCG    |
| Pont-R        | AGA AGG GCA CTT TGT TAC CCA    |
| Ada3-F        | CCT GAA AGC GGA GTA TGA TAG C  |
| Ada3-R        | AGA ATG GTC ATC GAA GAG TGC T  |
| Gcn5-F        | GGT GGA AAC AAG AGG ACC AGT G  |
| Gcn5-R        | CCA AAT TCT CAC TGC TTG GA     |
| TK-F          | TACAAGCGTGCAGCTCTCTC           |
| TK-R          | CTCCAGATCGCTCTTCTTGC           |
| Dipt-F        | AGGTGTGGACCAGCGACAA            |
| Dipt-R        | TGCTGTCCATATCCTCCATTCA         |
| PGRP-LC-F     | CACGCAGGGTATTGGCAGCATC         |
| PGRP-LC-R     | CCTCGCCCCGGTTTCCACTTG          |
| Cecropin-F    | CTCTCATTCTGGCCATCACC           |
| Cecropin-R    | CTTGTTGAGCGATTCCCAGT           |
| Sad-F         | CCGCATTCAGCAGTCAGTGG           |
| Sad-R         | ACCTGCCGTGTACAAGGAGAG          |
| Shd-F         | CGGGCTACTCGCTTAATGCAG          |

|                  |                          |
|------------------|--------------------------|
| <b>Shd-R</b>     | AGCAGCACCCACCTCCATTTTC   |
| <b>EcR-F</b>     | ACATGAGGCGAAAGTGTCAGGAGT |
| <b>EcR-R</b>     | TTTGTCTTCTCCTTCTGGGCCTT  |
| <b>Eig75B-F</b>  | GCGGTCCAGAATCAGCAG       |
| <b>Eig75B-R</b>  | GAGGATGTGGAGGAGGATGA     |
| <b>Eip74EF-F</b> | TTTCATCAAGTGGACGAACCGGGA |
| <b>Eip74EF-R</b> | CATGTCCGGCTTGTTCTTGTGCAT |
| <b>DomA-F</b>    | AGAGTCCCAAGAAGCAGAAGA    |
| <b>DomA-R</b>    | ATCAGGCTCGGAGCACTAAAC    |
| <b>DomB-F</b>    | GTC AACGGGGAAGGGAACAGA   |
| <b>DomB-R</b>    | CCTCGACGATCAAAGAGGCAT    |
| <b>H2Av-F</b>    | CGCACTACGTCACATGGAC      |
| <b>H2Av-R</b>    | TGGCGAGGAGTGATACGTTTC    |
| <b>Rp49-F</b>    | TACAGGCCCAAGATCGTGAAG    |
| <b>Rp49-R</b>    | GACGCACTCTGTTGTCGATACC   |
